# Supplementary material
Source: publisher site journal article supplement (https://www.dovepress.com/article/401655)
Supplement: Supplementary file 1 [file get_supplementary_file.php]

**Supplementary Table 1. Baseline participant characteristics stratified by standard deviation reduction in TMT performance from baseline to follow-up**

|  | **Cognitive follow-up examination participants** | | | | | |
| --- | --- | --- | --- | --- | --- | --- |
| **Follow-up cognitive performance domains** | **Visual attention and processing speed (TMT-A)** | | | **Executive function (TMT-B)** | | |
| **Cognitive performance subgroups** | **<0.5 *SD* reduction (n=121)** | **≥0.5 *SD* reduction (n=18)** | ***p*-values** | **<0.5 *SD* reduction (n=121)** | **≥0.5 *SD* reduction (n=18)** | ***p*-values** |
| Age (years), % (n) |  |  |  |  |  |  |
| <50 | 22.3 (27) | 5.5 (1) | **<0.001**  **0.001**  **<0.001**  **0.008** | 21.5 (26) | 11.1 (2) | **0.016**  **0.008**  **0.012**  **0.006** |
| 50–59 | 38.8 (47) | 16.7 (3) | 35.5 (43) | 28.6 (6) |
| 60–69 | 30.6 (37) | 38.9 (7) | 35.5 (43) | 27.8 (5) |
| ≥70 | 8.3 (10) | 38.9 (7) | 9.1 (11) | 27.8 (5) |
| Financial stress, % (n) |  |  |  |  |  |  |
| Spends >earns | 86.0 (104) | 66.7 (12) | **0.005** | 87.6 (106) | 83.3 (15) | 0.56 |
| Highest education, % (n) |  |  |  |  |  |  |
| ≥Diploma, certificate, trade, bachelor’s degree or higher | 72.7 (88) | 77.8 (14) | 0.66 | 76.9 (93) | 72.2 (13) | 0.51 |
| Married/partner, % (n) | 87.6 (106) | 94.4 (17) | 0.16 | 88.4 (107) | 88.8 (16) | 0.62 |
| BMI (kg/m2), % (n) |  |  |  |  |  |  |
| <25 (underweight/normal) | 21.5 (26) | 5.5 (1) | 0.26 | 20.7 (25) | 11.1 (2) | 0.18 |
| 25 to <30 (overweight) | 44.6 (54) | 55.5 (10) | 0.12 | 43.0 (52) | 61.1 (11) | 0.99 |
| ≥30 (obese) | 33.1 (40) | 38.9 (7) | 0.99 | 36.4 (44) | 22.2 (4) | 0.11 |
| Diabetes mellitus, % (n) | 15.7 (19) | 16.7 (3) | 0.80 | 14.9 (18) | 27.8 (5) | 0.14 |
| Hypertension, % (n) | 56.2 (68) | 66.7 (12) | 0.23 | 57.9 (70) | 61.1 (11) | 0.82 |
| CVD, % (n) | 3.3 (4) | 11.1 (2) | 0.15 | 4.1 (5) | 11.1 (2) | 0.29 |
| Insomnia, % (n) | 9.1 (11) | 16.7 (3) | 0.20 | 8.3 (10) | 22.2 (4) | 0.050 |
| SEIFA IRSD, % (n) |  |  |  |  |  |  |
| Quintile 1 (most socio-economic disadvantage) | 19.0 (23) | 27.8 (5) | 0.24  0.40  0.21  0.49  0.73 | 21.5 (26) | 22.2 (4) | 0.082  0.92  0.087  0.38  0.63 |
| Quintile 2 | 8.3 (10) | 16.7 (3) | 7.4 (9) | 22.2 (4) |
| Quintile 3 | 31.4 (38) | 16.7 (3) | 31.4 (38) | 11.1 (2) |
| Quintile 4 | 27.2 (33) | 27.8 (5) | 26.4 (32) | 33.3 (6) |
| Quintile 5 (least socio-economic disadvantage) | 13.2 (16) | 11.1 (2) | 13.2 (16) | 11.1 (2) |
| Current smokers, % (n) | 15.7 (19) | 5.5 (1) | 0.20 | 14.0 (17) | 16.7 (3) | 0.65 |
| Sedentary activity, % (n) | 18.2 (22) | 16.7 (3) | 0.88 | 20.7 (25) | 5.5 (1) | 0.084 |

**Abbreviations:** SEIFA IRSD, Socio-Economic Indexes for Areas Index of Relative Socio-Economic Disadvantage; BMI, body mass index; CVD, cardiovascular disease; *SD*, standard deviation; IQR, interquartile range.

**Cognitive follow-up examination participants:** Includes results for men who participated in both the baseline and follow-up cognitive assessments.

**Cognitive performance subgroups:** divided into participants who showed a <0.5 *SD* reduction versus a ≥0.5 *SD* reduction in TMT-A or TMT-B performance from baseline to follow-up.

**Visual attention and processing speed (TMT-A):** Includes results of baseline participant characteristics by TMT-A performance subgroups

**Executive function (TMT-B):** Includes baseline characteristics by TMT-B performance subgroups.

**<0.5 *SD* reduction:** Includes baseline characteristics for men who showed a <0.5 *SD* reduction in TMT-A or TMT-B performance between the baseline and follow-up cognitive assessments.

**≥0.5 *SD* reduction:** Includes baseline characteristics results for men who showed a ≥0.5 *SD* reduction in TMT-A or TMT-B performance between the baseline and follow-up cognitive assessments.

***p-*values:** Those <0.05 are boldfaced to indicate a statistically significant between-group difference in the variable of interest.

**BMI:** body mass index categorised according to international criteria from the World Health Organisation (<25 [underweight/normal], 25 to <30 [overweight], and ≥30 kg/m2 [obese]).

**Cardiovascular disease:** self-reported, doctor-diagnosed myocardial infarction, angina, transient ischemic attack, or stroke.

**Diabetes mellitus:** self-reported, doctor-diagnosed, fasting plasma glucose ≥7.0 mmol/L (126 mg/dL), haemoglobin A1C ≥6.5%, or reported antidiabetic medication use (oral hypoglycaemic agents and/or insulin).

**Insomnia:** difficulty initiating or maintaining sleep occurring at least three nights/week (PSQI dimensions) and significant daytime fatigue defined as a score one standard deviation below the mean on the 36-item short-form survey instrument (SF-36) Vitality Scale.

**Hypertension:** systolic blood pressure ≥140 mmHg and/or diastolic blood pressure ≥90 mmHg or reported antihypertensive medication use.

**Cardio-metabolic conditions:** one or more of hypertension, diabetes mellitus, or cardiovascular disease.

Psychotropic medication(s): Use of one or more of opiates, antipsychotics, antiepileptics, antidepressants, or benzodiazepines.

**Notes:** all PSG measures were scored according to AASM 2007 *Alternative* scoring criteria in which an AHI of 10/h is approximately equivalent to an AHI of 5/h used to define sleep-disordered breathing by the AASM 2007 *Recommended* scoring criteria.

**Supplementary Table 2. Unadjusted and adjusted associations of baseline sleep microarchitecture parameters with standardized (z-score) follow-up TMT-A performance in men who did not report using psychoactive medication(s)**

|  | Unadjusted Model | | Adjusted Model 1 | | Adjusted Model 2 | |
| --- | --- | --- | --- | --- | --- | --- |
|  | *B* (95% CI) | *p* | *B* (95% CI) | *p* | *B* (95% CI) | *p* |
| NREM sleep |  |  |  |  |  |  |
| Delta | 0.003 (-0.03, 0.03) | 0.83 | 0.001 (-0.03, 0.03) | 0.99 | 0.003 (-0.02, 0.03) | 0.81 |
| Theta | 0.01 (-0.05, 0.08) | 0.74 | 0.02 (-0.05, 0.08) | 0.61 | 0.003 (-0.05, 0.06) | 0.91 |
| Alpha | -0.01 (-0.09, 0.07) | 0.73 | -0.007 (-0.08, -0.07) | 0.84 | -0.02 (-0.09, 0.04) | 0.52 |
| Sigma | -0.15 (-0.35, 0.05) | 0.13 | -0.08 (-0.26, 0.11) | 0.44 | -0.07 (-0.24, 0.10) | 0.44 |
| Beta | -0.006 (-0.12, 0.11) | 0.92 | -0.009 (-0.12, 0.10) | 0.87 | 0.01 (-0.09, 0.11) | 0.80 |
| Slowing ratio | 0.13 (-0.79, 1.05) | 0.79 | 0.05 (-0.80, 0.90) | 0.91 | 0.12 (-0.64, 0.88) | 0.76 |
| REM sleep |  |  |  |  |  |  |
| Delta | -0.02 (-0.04, 0.0004) | 0.055 | -0.01 (-0.03, 0.005) | 0.15 | -0.007 (-0.03, 0.01) | 0.46 |
| Theta | 0.05 (-0.006, 0.10) | 0.083 | 0.04 (-0.003, 0.09) | 0.069 | 0.02 (-0.02, 0.07) | 0.31 |
| Alpha | 0.08 (0.004, 0.16) | **0.039** | 0.05 (-0.03, 0.12) | 0.21 | 0.02 (-0.05, 0.09) | 0.53 |
| Sigma | 0.092 (-0.07, 0.26) | 0.27 | 0.04 (-0.12, 0.20) | 0.62 | 0.02 (-0.12, 0.16) | 0.78 |
| Beta | 0.04 (-0.02, 0.09) | 0.22 | 0.02 (-0.04, 0.07) | 0.51 | 0.006 (-0.04, 0.05) | 0.79 |
| Slowing ratio | -0.003 (-0.04, 0.04) | 0.89 | -0.003 (-0.04, 0.03) | 0.87 | 0.001 (-0.03, 0.03) | 0.96 |
| N2 spindles |  |  |  |  |  |  |
| Occurrence | -0.002 (-0.003, -0.0004) | **0.009** | -0.0001 (-0.001, 0.001) | 0.79 | -0.0004 (-0.002, 0.001) | 0.47 |
| Overall density | -0.39 (-0.65, -0.13) | **0.004** | -0.08 (-0.35, 0.19) | 0.57 | -0.11 (-0.35, 0.14) | 0.39 |
| Fast density | -0.35 (-0.88, 0.18) | 0.20 | 0.17 (-0.34, 0.68) | 0.51 | 0.04 (-0.43, 0.51) | 0.87 |
| Slow density | -0.62 (-0.99, -0.25) | **0.001** | -0.25 (-0.63, 0.13) | 0.19 | -0.23 (-0.58, 0.11) | 0.19 |
| Frequency | 0.49 (-0.22, 1.20) | 0.18 | 0.59 (-0.05, 1.24) | 0.071 | 0.56 (-0.03, 1.15) | 0.061 |
| Amplitude | -0.03 (-0.09, 0.03) | 0.36 | 0.04 (-0.02, 0.09) | 0.24 | 0.03 (-0.03, 0.08) | 0.33 |
| N3 spindles |  |  |  |  |  |  |
| Occurrence | -0.004 (-0.008, -0.001) | **0.024** | -0.002 (-0.006, 0.001) | 0.23 | -0.001 (-0.005, 0.002) | 0.44 |
| Overall density | -0.45 (-0.75, -0.15) | **0.003** | -0.17 (-0.46, 0.13) | 0.27 | -0.13 (-0.40, 0.14) | 0.35 |
| Fast density | -0.36 (-1.47, 0.76) | 0.53 | 0.41 (-0.64, 1.46) | 0.44 | 0.26 (-0.70, 1.23) | 0.59 |
| Slow density | -0.59 (-0.94, -0.24) | **0.001** | -0.27 (-0.62, 0.07) | 0.12 | -0.21 (-0.53, 0.11) | 0.20 |
| Frequency | 0.04 (-0.11, 0.20) | 0.58 | 0.08 (-0.07, 0.22) | 0.29 | 0.05 (-0.08, 0.18) | 0.45 |
| Amplitude | -0.02 (-0.06, 0.02) | 0.28 | 0.01 (-0.02, 0.05) | 0.45 | 0.006 (-0.03, 0.04) | 0.72 |

**Abbreviations:** NREM, non-rapid eye movement; REM, rapid eye movement; CI, confidence interval.

**Coefficients:** unstandardized beta (*B*) coefficients (95% confidence interval) from univariable and multivariable regression models are reported.

**Estimates:** estimates represent the change in follow-up TMT-A scores corresponding to a 1% increase in baseline relative EEG spectral power and a one-unit increase in baseline logarithmically (10-base) transformed EEG slowing ratio.

**Boldfaced *p*-values:** statistically significant at the 0.05 level.

**EEG relative spectral powers:** delta: 0.5–4 Hz; theta: 4.5–8 Hz; alpha: 8–12 Hz; sigma: 12–15 Hz; beta: 15–32 Hz.

**EEG slowing ratio:** calculated as a ratio of slow to fast EEG frequencies [(delta+theta)/(alpha+sigma+beta)].

**N2 and N3 sleep spindle metrics:** occurrence (11–16 Hz, total events), overall density (11–16 Hz, number/minute), fast density (13–16 Hz, number/minute), slow density (11–13 Hz, number/minute), average frequency (Hz), and amplitude (µV).

**Adjusted Model 1:** adjusted for baseline age, AHI, highest educational attainment, socio-economic disadvantage, marital status, BMI, and cardio-metabolic conditions (one or more of cardiovascular disease, diabetes mellitus, or hypertension).

**Adjusted Model 2:** additionally adjusted for baseline cognitive task performance.

**Spindle occurrence (adjusted Model 1 and 2):** additionally adjusted for total sleep time.

**Supplementary Table 3. Unadjusted and adjusted associations of baseline sleep microarchitecture parameters with standardized (z-score) follow-up TMT-B performance in men who did not report using psychoactive medication(s)**

|  | Unadjusted Model | | Adjusted Model 1 | | Adjusted Model 2 | |
| --- | --- | --- | --- | --- | --- | --- |
|  | *B* (95% CI) | *p* | *B* (95% CI) | *p* | *B* (95% CI) | *p* |
| NREM sleep |  |  |  |  |  |  |
| Delta | 0.02 (-0.009, 0.05) | 0.20 | 0.02 (-0.007, 0.05) | 0.15 | 0.02 (-0.003, 0.04) | 0.091 |
| Theta | -0.03 (-0.10, 0.03) | 0.29 | -0.04 (-0.10, 0.02) | 0.18 | -0.03 (-0.08, 0.02) | 0.22 |
| Alpha | -0.04 (-0.11, 0.04) | 0.34 | -0.04 (-0.12, 0.03) | 0.26 | -0.04 (-0.10, 0.02) | 0.17 |
| Sigma | -0.18 (-0.37, 0.01) | 0.068 | -0.14 (-0.33, 0.06) | 0.17 | -0.13 (-0.28, 0.02) | 0.098 |
| Beta | -0.05 (-0.16, 0.06) | 0.36 | -0.06 (-0.17, 0.06) | 0.31 | -0.08 (-0.16, 0.01) | 0.097 |
| Slowing ratio | 0.44 (-0.43, 1.32) | 0.32 | 0.48 (-0.39, 1.34) | 0.28 | 0.50 (-0.18, 1.18) | 0.15 |
| REM sleep |  |  |  |  |  |  |
| Delta | -0.005 (-0.03, 0.02) | 0.65 | 0.001 (-0.02, 0.02) | 0.89 | 0.006 (-0.01, 0.02) | 0.49 |
| Theta | 0.007 (-0.04, 0.06) | 0.80 | 0.002 (-0.05, 0.05) | 0.94 | 0.003 (-0.04, 0.04) | 0.87 |
| Alpha | 0.02 (-0.05, 0.10) | 0.58 | -0.008 (-0.08, 0.07) | 0.84 | -0.02 (-0.08, 0.04) | 0.50 |
| Sigma | 0.001 (-0.16, 0.16) | 0.99 | -0.05 (-0.21, 0.11) | 0.52 | -0.08 (-0.20, 0.05) | 0.23 |
| Beta | 0.01 (-0.04, 0.07) | 0.63 | -0.002 (-0.06, 0.06) | 0.94 | -0.02 (-0.07, 0.02) | 0.28 |
| Slowing ratio | 0.01 (-0.03, 0.05) | 0.56 | 0.01 (-0.02, 0.05) | 0.46 | 0.01 (-0.02, 0.04) | 0.36 |
| N2 spindles |  |  |  |  |  |  |
| Occurrence | -0.001 (-0.002, 0.0004) | 0.20 | 0.0004 (-0.001, 0.002) | 0.50 | 0.0002 (-0.001, 0.001) | 0.76 |
| Overall density | -0.18 (0.44, 0.08) | 0.17 | 0.09 (-0.18, 0.37) | 0.50 | 0.06 (-0.16, 0.28) | 0.57 |
| Fast density | -0.09 (-0.61, 0.42) | 0.72 | 0.39 (-0.12, 0.90) | 0.13 | 0.22 (-0.20, 0.63) | 0.30 |
| Slow density | -0.33 (-0.70, 0.04) | 0.083 | -0.03 (-0.42, 0.35) | 0.28 | 0.003 (-0.31, 0.31) | 0.98 |
| Frequency | 0.11 (-0.58, 0.80) | 0.75 | 0.29 (-0.37, 0.95) | 0.39 | 0.05 (-0.48, 0.59) | 0.85 |
| Amplitude | -0.02 (-0.08, 0.04) | 0.47 | 0.02 (-0.04, 0.08) | 0.54 | -0.003 (-0.05, 0.05) | 0.92 |
| N3 spindles |  |  |  |  |  |  |
| Occurrence | -0.001 (-0.004, 0.003) | 0.73 | 0.001 (-0.002, 0.005) | 0.50 | 0.001 (-0.002, 0.004) | 0.40 |
| Overall density | -0.05 (-0.35, 0.25) | 0.74 | 0.22 (-0.08, 0.52) | 0.15 | 0.15 (-0.09, 0.39) | 0.23 |
| Fast density | 0.44 (-0.63, 1.52) | 0.42 | 1.30 (0.26, 2.34) | **0.014** | 0.70 (-0.16, 1.56) | 0.11 |
| Slow density | -0.12 (-0.47, 0.24) | 0.52 | 0.16 (-0.20, 0.51) | 0.39 | 0.13 (-0.16, 0.41) | 0.37 |
| Frequency | 0.08 (-0.07, 0.23) | 0.31 | 0.13 (-0.01, 0.27) | 0.076 | 0.07 (-0.05, 0.18) | 0.27 |
| Amplitude | -0.02 (-0.06, 0.01) | 0.21 | 0.001 (-0.04, 0.04) | 0.95 | -0.02 (-0.05, 0.02) | 0.31 |

**Abbreviations:** NREM, non-rapid eye movement; REM, rapid eye movement; CI, confidence interval.

**Coefficients:** unstandardized beta (*B*) coefficients (95% confidence interval) from univariable and multivariable regression models are reported.

**Boldfaced *p*-values:** statistically significant at the 0.05 level.

**Estimates:** estimates represent the change in follow-up TMT-B scores corresponding to a 1% increase in baseline relative EEG spectral power and a one-unit increase in baseline logarithmically (10-base) transformed EEG slowing ratio.

**EEG relative spectral powers:** delta: 0.5–4 Hz; theta: 4.5–8 Hz; alpha: 8–12 Hz; sigma: 12–15 Hz; beta: 15–32 Hz.

**EEG slowing ratio:** calculated as a ratio of slow to fast EEG frequencies [(delta+theta)/(alpha+sigma+beta)].

**N2 and N3 sleep spindle metrics:** occurrence (11–16 Hz, total events), overall density (11–16 Hz, number/minute), fast density (13–16 Hz, number/minute), slow density (11–13 Hz, number/minute), average frequency (Hz), and amplitude (µV).

**Adjusted Model 1:** adjusted for baseline age, AHI, highest educational attainment, socio-economic disadvantage, marital status, BMI, and cardio-metabolic conditions (one or more of cardiovascular disease, diabetes mellitus, or hypertension).

**Adjusted Model 2:** additionally adjusted for baseline cognitive task performance.

**Spindle occurrence (adjusted Model 1 and 2):** additionally adjusted for total sleep time.

**Supplementary Table 4. Unadjusted and adjusted logistic regression analyses of sleep microarchitecture parameters at baseline with impaired SMMSE performance at follow-up.**

|  | Unadjusted Model | | Adjusted Model 1 | | Adjusted Model 2 | |
| --- | --- | --- | --- | --- | --- | --- |
|  | OR (95% CI) | *p* | OR (95% CI) | *p* | OR (95% CI) | *p* |
| NREM sleep |  |  |  |  |  |  |
| Delta | 0.99 (0.93, 1.07) | 0.85 | 1.02 (0.93, 1.12) | 0.71 | 1.01 (0.90, 1.12) | 0.91 |
| Theta | 1.08 (0.92, 1.25) | 0.35 | 1.01 (0.84, 1.23) | 0.89 | 1.04 (0.85, 1.28) | 0.72 |
| Alpha | 1.02 (0.85, 1.23) | 0.82 | 0.95 (0.74, 1.23) | 0.70 | 0.99 (0.76, 1.30) | 0.95 |
| Sigma | 0.78 (0.46, 1.33) | 0.37 | 0.72 (0.34, 1.50) | 0.37 | 0.76 (0.32, 1.78) | 0.52 |
| Beta | 0.89 (0.64, 1.24) | 0.48 | 0.80 (0.47, 1.35) | 0.40 | 0.73 (0.38, 1.40) | 0.35 |
| Slowing ratio | 1.34 (0.14, 12.8) | 0.80 | 2.94 (0.15, 56.2) | 0.48 | 2.58 (0.09, 76.8) | 0.58 |
| REM sleep |  |  |  |  |  |  |
| Delta | 0.99 (0.93, 1.04) | 0.58 | 1.01 (0.94, 1.09) | 0.74 | 1.04 (0.96, 1.13) | 0.38 |
| Theta | 1.03 (0.90, 1.16) | 0.69 | 1.02 (0.85, 1.21) | 0.84 | 0.97 (0.80, 1.18) | 0.77 |
| Alpha | 1.09 (0.91, 1.32) | 0.36 | 1.00 (0.77, 1.30) | 0.99 | 0.96 (0.70, 1.30) | 0.77 |
| Sigma | 1.01 (0.68, 1.51) | 0.95 | 0.77 (0.46, 1.32) | 0.34 | 0.65 (0.35, 1.21) | 0.18 |
| Beta | 1.02 (0.90, 1.17) | 0.74 | 0.94 (0.78, 1.13) | 0.49 | 0.87 (0.70, 1.09) | 0.22 |
| Slowing ratio | 1.01 (0.92, 1.10) | 0.87 | 1.04 (0.93, 1.16) | 0.48 | 1.04 (0.92, 1.19) | 0.52 |
| N2 spindles |  |  |  |  |  |  |
| Occurrence | 1.00 (0.99, 1.001) | 0.99 | 1.00 (0.99, 1.004) | 0.66 | 1.00 (0.995, 1.006) | 0.91 |
| Overall density | 0.57 (0.27, 1.24) | 0.16 | 0.90 (0.34, 2.42) | 0.84 | 1.05 (0.36, 3.06) | 0.93 |
| Fast density | 0.20 (0.03, 1.41) | 0.11 | 0.44 (0.04, 4.65) | 0.50 | 0.60 (0.06, 6.52) | 0.68 |
| Slow density | 0.63 (0.22, 1.77) | 0.38 | 1.10 (0.32, 3.84) | 0.88 | 1.33 (0.33, 5.33) | 0.91 |
| Frequency | 0.33 (0.06, 1.87) | 0.21 | 0.22 (0.02, 2.37) | 0.21 | 0.20 (0.02, 2.75) | 0.23 |
| Amplitude | 0.84 (0.70, 1.01) | 0.065 | 0.88 (0.68, 1.13) | 0.31 | 0.90 (0.69, 1.17) | 0.42 |
| N3 spindles |  |  |  |  |  |  |
| Occurrence | 1.00 (0.99, 1.01) | 0.48 | 1.00 (0.99, 1.01) | 0.84 | 1.00 (0.99, 1.01) | 0.64 |
| Overall density | 0.63 (0.27, 1.46) | 0.28 | 0.87 (0.35, 2.16) | 0.77 | 0.90 (0.35, 2.31) | 0.82 |
| Fast density | 0.06 (0.001, 3.29) | 0.17 | 0.14 (0.001, 19.2) | 0.44 | 0.10 (0.00, 19.4) | 0.39 |
| Slow density | 0.67 (0.26, 1.71) | 0.40 | 0.92 (0.34, 2.52) | 0.87 | 0.97 (0.34, 2.76) | 0.96 |
| Frequency | 1.96 (0.69, 5.58) | 0.21 | 3.23 (0.72, 14.5) | 0.13 | 2.07 (0.39, 11.1) | 0.40 |
| Amplitude | 0.94 (0.83, 1.06) | 0.32 | 1.00 (0.85, 1.17) | 0.95 | 0.97 (0.79, 1.18) | 0.74 |

**Abbreviations:** NREM, non-rapid eye movement; REM, rapid eye movement; CI, confidence interval.

**Estimates:** estimates represent the odds of scoring <28/30 on the SMMSE at follow-up corresponding to a 1% increase in relative EEG spectral power at baseline and a one-unit increase in logarithmically (10-base) transformed EEG slowing ratio at baseline.

**EEG relative spectral powers:** delta: 0.5–4 Hz; theta: 4.5–8 Hz; alpha: 8–12 Hz; sigma: 12–15 Hz; beta: 15–32 Hz.

**EEG slowing ratio:** calculated as a ratio of slow to fast EEG frequencies (delta+theta)/(alpha+sigma+beta).

**N2 and N3 sleep spindle metrics:** occurrence (11–16 Hz, total events), overall density (11–16 Hz, number/minute), fast density (13–16 Hz, number/minute), slow density (11–13 Hz, number/minute), mean frequency (Hz), and maximum amplitude (µV).

**Adjusted Model 1:** adjusted for baseline age, AHI, highest educational attainment, socio-economic disadvantage, marital status, BMI, and cardio-metabolic conditions (one or more of cardiovascular disease, diabetes mellitus, or hypertension).

**Adjusted Model 2:** additionally adjusted for baseline cognitive performance.

**Spindle occurrence (Adjusted Model 1 and 2):** additionally adjusted for total sleep time.

**Supplementary Table 5. Unadjusted and adjusted logistic regression analyses of sleep microarchitecture parameters at baseline with impaired SMMSE performance at follow-up in men who did not report using psychoactive medication(s).**

|  | Unadjusted Model | | Adjusted Model 1 | | Adjusted Model 2 | |
| --- | --- | --- | --- | --- | --- | --- |
|  | OR (95% CI) | *p* | OR (95% CI) | *p* | OR (95% CI) | *p* |
| NREM sleep |  |  |  |  |  |  |
| Delta | 0.97 (0.92, 1.02) | 0.71 | 1.01 (0.91, 1.15) | 0.67 | 1.01 (0.91, 1.13) | 0.91 |
| Theta | 1.09 (0.91, 1.28) | 0.31 | 1.01 (0.82, 1.22) | 0.90 | 1.03 (0.83, 1.27) | 0.74 |
| Alpha | 1.01 (0.88, 1.16) | 0.90 | 0.92 (0.72, 1.22) | 0.60 | 0.98 (0.75, 1.29) | 0.94 |
| Sigma | 0.80 (0.44, 1.24) | 0.46 | 0.74 (0.35, 1.49) | 0.42 | 0.76 (0.32, 1.79) | 0.52 |
| Beta | 0.86 (0.58, 1.19) | 0.39 | 0.78 (0.49, 1.34) | 0.36 | 0.72 (0.37, 1.38) | 0.35 |
| Slowing ratio | 1.35 (0.12, 12.4) | 0.73 | 2.92 (0.19, 55.8) | 0.51 | 2.55 (0.08, 75.7) | 0.61 |
| REM sleep |  |  |  |  |  |  |
| Delta | 0.97 (0.90, 1.05) | 0.50 | 1.01 (0.94, 1.10) | 0.74 | 1.06 (0.97, 1.15) | 0.33 |
| Theta | 1.04 (0.88, 1.18) | 0.64 | 1.01 (0.86, 1.20) | 0.86 | 0.97 (0.79, 1.17) | 0.78 |
| Alpha | 1.06 (0.85, 1.26) | 0.49 | 1.00 (0.76, 1.32) | 0.99 | 0.95 (0.68, 1.29) | 0.75 |
| Sigma | 1.02 (0.66, 1.53) | 0.97 | 0.79 (0.49, 1.33) | 0.38 | 0.66 (0.36, 1.22) | 0.22 |
| Beta | 1.02 (0.89, 1.18) | 0.75 | 0.92 (0.77, 1.12) | 0.46 | 0.87 (0.69, 1.09) | 0.22 |
| Slowing ratio | 1.01 (0.91, 1.11) | 0.86 | 1.04 (0.92, 1.16) | 0.48 | 1.03 (0.91, 1.18) | 0.52 |
| N2 spindles |  |  |  |  |  |  |
| Occurrence | 1.00 (0.99, 1.001) | 0.99 | 0.99 (0.98, 1.003) | 0.58 | 0.99 (0.994, 1.00) | 0.88 |
| Overall density | 0.54 (0.22, 1.21) | 0.11 | 0.91 (0.36, 2.45) | 0.87 | 1.03 (0.33, 3.01) | 0.89 |
| Fast density | 0.19 (0.04, 1.43) | 0.096 | 0.42 (0.02, 4.59) | 0.45 | 0.57 (0.05, 6.48) | 0.61 |
| Slow density | 0.60 (0.18, 1.81) | 0.33 | 1.11 (0.31, 3.82) | 0.87 | 1.31 (0.34, 5.31) | 0.88 |
| Frequency | 0.30 (0.02, 1.84) | 0.16 | 0.21 (0.01, 2.35) | 0.17 | 0.20 (0.02, 2.76) | 0.23 |
| Amplitude | 0.84 (0.71, 1.02) | 0.063 | 0.90 (0.71, 1.10) | 0.35 | 0.91 (0.69, 1.19) | 0.44 |
| N3 spindles |  |  |  |  |  |  |
| Occurrence | 1.01 (0.98, 1.02) | 0.44 | 1.01 (0.99, 1.02) | 0.79 | 0.99 (0.98, 1.00) | 0.59 |
| Overall density | 0.61 (0.25, 1.48) | 0.24 | 0.85 (0.31, 2.12) | 0.73 | 0.92 (0.36, 2.34) | 0.85 |
| Fast density | 0.05 (0.001, 3.26) | 0.18 | 0.12 (0.003, 18.5) | 0.40 | 0.09 (0.01, 19.1) | 0.36 |
| Slow density | 0.67 (0.25, 1.70) | 0.40 | 0.92 (0.33, 2.51) | 0.87 | 0.96 (0.32, 2.75) | 0.94 |
| Frequency | 1.94 (0.65, 5.67) | 0.26 | 3.26 (0.74, 14.9) | 0.10 | 2.04 (0.34, 10.6) | 0.36 |
| Amplitude | 0.93 (0.82, 1.05) | 0.31 | 1.00 (0.86, 1.18) | 0.96 | 0.96 (0.78, 1.17) | 0.72 |

**Abbreviations:** NREM, non-rapid eye movement; REM, rapid eye movement; CI, confidence interval.

**Estimates:** estimates represent the odds of scoring <28/30 on the SMMSE at follow-up corresponding to a 1% increase in relative EEG spectral power at baseline and a one-unit increase in logarithmically (10-base) transformed EEG slowing ratio at baseline.

**EEG relative spectral powers:** delta: 0.5–4 Hz; theta: 4.5–8 Hz; alpha: 8–12 Hz; sigma: 12–15 Hz; beta: 15–32 Hz.

**EEG slowing ratio:** calculated as a ratio of slow to fast EEG frequencies (delta+theta)/(alpha+sigma+beta).

**N2 and N3 sleep spindle metrics:** occurrence (11–16 Hz, total events), overall density (11–16 Hz, number/minute), fast density (13–16 Hz, number/minute), slow density (11–13 Hz, number/minute), mean frequency (Hz), and maximum amplitude (µV).

**Adjusted Model 1:** adjusted for baseline age, AHI, highest educational attainment, socio-economic disadvantage, marital status, BMI, and cardio-metabolic conditions (one or more of cardiovascular disease, diabetes mellitus, or hypertension).

**Adjusted Model 2:** additionally adjusted for baseline cognitive performance.

**Spindle occurrence (Adjusted Model 1 and 2):** additionally adjusted for total sleep time.

**Supplementary Figure 1. Baseline and follow-up TMT-A times relative to normative values of age and highest educational attainment**

**Post high school qualification**

**High school qualification or less**

**75+ years**

**70-74 years**

**65-69 years**

**60-64 years**

**55-59 years**

**45-54 years**

**35-44 years**

Black lines represent previously reported normative TMT-A scores relative to age and educational attainment. Categories: 35–44 years, high school qualification or less [n=2] and post high school qualification [n=4]; 45–54 years, high school qualification or less [n=9] and post high school qualification [n=36]; 55–59 years, high school qualification or less [n=10] and post high school qualification [n=22]; 60–64 years, high school qualification or less [n=8] and post high school qualification [n=26]; 65–69 years, high school qualification or less [n=5] and post high school qualification [n=13]; 70–74 years, high school qualification or less [n=4] and post high school qualification [n=12]; and 75+ years, high school qualification or less [n=1] and post high school qualification [n=4]).

**Supplementary Figure 2. Baseline and follow-up TMT-B times relative to normative values of age and highest educational attainment.**

**Post high school qualification**

**High school qualification or less**

**35-44 years**

**75+ years**

**70-74 years**

**65-69 years**

**60-64 years**

**45-54 years**

**55-59 years**

Black lines represent previously reported normative TMT-B scores relative to age and educational attainment. Categories: 35–44 years, high school qualification or less [n=2] and post high school qualification [n=4]; 45–54 years, high school qualification or less [n=9] and post high school qualification [n=36]; 55–59 years, high school qualification or less [n=10] and post high school qualification [n=22]; 60–64 years, high school qualification or less [n=8] and post high school qualification [n=26]; 65–69 years, high school qualification or less [n=5] and post high school qualification [n=13]; 70–74 years, high school qualification or less [n=4] and post high school qualification [n=12]; and 75+ years, high school qualification or less [n=1] and post high school qualification [n=4]).
